# Supplementary material for: Integrin-Linked Kinase Expression in Human Valve Endothelial Cells Plays a Protective Role in Calcific Aortic Valve Disease
Source: MDPI journal article supplement (doi:10.3390/antiox11091736), 2022-08-31
Supplement: s1 [file s1]

**Table S1. Reagents and Antibodies.**

Carazzi hematoxylin and DPX were from Casa Alvarez (Madrid, Spain). Mouse and Rabbit Specific HRP/DAB (ABC) Detection IHC kit and Von Kossa Stain Kit were from Abcam. General cell culture supplies were purchased from Lonza (Basel, Switzerland); fetal bovin serum was from Gibco (Waltham, Ma, USA); matrigel from Corning (Corning, NY, USA). Cell culture-grade gelatin, hematoxylin-eosin, Alizarin Red, beta-glycerolphosphate, ascorbic acid, AcH and Apocynin from Sigma Aldrich (San Luis, MO, USA). SuperSignal detection system Pierce™ ECL Western Blotting Substrate and Noggin from Thermo Fisher Scientific (Waltham, MA,

USA). Dihydroethidium (DHE), DAF-2, DETA-NONOate, and Dexamethasone from Invitrogen Corporation (Carlsbad, CA, USA). Complet mini, phosphostop, Dispasa II were from Roche (Switzerland). LDN193189 and Fluorsave Reagent from Merck (Darmstadt, Germany). A detail listing of the antibodies used through the study is provided bellow.

| <b>Antibody</b>                                                       | <b>Supplier</b>     | <b>Reference</b> | <b>Dilution</b>    |
|-----------------------------------------------------------------------|---------------------|------------------|--------------------|
| <b>Anti-ILK</b>                                                       | RD Systems          | MAB374           | WB: 1-1000         |
|                                                                       | Bioss               | BS-0317R         | IF/IHC: 1-50       |
| <b>Anti-Ve-cadherin</b>                                               | Santa cruz          | sc-9989          | WB: 1-250          |
| <b>Anti-CD31</b>                                                      | Abcam               | ab32457          | IF: 1-50           |
|                                                                       |                     |                  | WB:1-500           |
| <b>Anti- a-smooth muscle actin</b>                                    | Thermo Scientific   | MA1-06110        | IF:1-200 WB:1-1000 |
| <b>Anti-GAPDH</b>                                                     | Millipore           | MAB374           | WB: 1-1000         |
| <b>Anti- Transgelin</b>                                               | Santa Cruz          | sc-53932         | WB: 1-1000         |
| <b>Anti- SNAI</b>                                                     | Santa Cruz          | sc-271977        | WB: 1-1000         |
|                                                                       |                     |                  | IF: 1:50           |
| <b>Anti- phospho Smad 2</b>                                           | Cell signaling      | 18338            | WB: 1-500          |
|                                                                       |                     |                  | IF: 1-50           |
| <b>Anti- phospho Smad 3</b>                                           | Santa Cruz          | sc-517575        | WB: 1-500          |
| <b>Anti- von Willebran Factor</b>                                     | Santa Cruz          | sc-365712        | WB: 1-500          |
| <b>Anti-TGFβ</b>                                                      | Santa Cruz          | sc-130348        | IF:1-50            |
| <b>Anti-Smad2/3</b>                                                   | BD Biosciences      | 610842           | WB: 1-500          |
| <b>Anti-BMP2</b>                                                      | Abcam               | ab82511          | WB: 1-1000         |
| <b>Anti- RUNX2</b>                                                    | Santa Cruz          | Sc-390351        | WB: 1-500          |
|                                                                       |                     |                  | IF:1-50            |
| <b>Anti- phospho Smad 5</b>                                           | Cell signaling      | 9516             | WB: 1-500          |
| <b>Anti-Smad 5</b>                                                    | Cell signaling      | 12534            | WB: 1-500          |
| <b>anti-GSI I-isoleoctin B4 (IB4)</b>                                 | Vector Laboratories | FL-1201          | IF:1-100           |
| <b>eNOS</b>                                                           | BD Biosciences      | 610296           | IF:1-50            |
| <b>Anti-Nitrotyrosine</b>                                             | Millipore           | 06-284           | WB:1-1000          |
|                                                                       |                     |                  | IF: 1-50           |
| <b>HRP-conjugated anti-Mouse secondary antibody</b>                   | Invitrogen          | A16072           | WB: 1-20000        |
| <b>HRP-conjugated anti-Rabbit secondary antibody</b>                  | Invitrogen          | 31466            | WB: 1-50000        |
| <b>Alexa fluor 488 conjugated Goat anti-Rabbit secondary antibody</b> | Abcam               | ab150081         | IF,;1-500          |
| <b>Alexa fluor 488 conjugated Goat anti-mouse secondary antibody</b>  | Abcam               | ab150113         | IF,;1-500          |

|                                                                       |       |          |           |
|-----------------------------------------------------------------------|-------|----------|-----------|
| <b>Alexa fluor 647 conjugated Goat anti-mouse secondary antibody</b>  | Abcam | ab150115 | IF,:1-500 |
| <b>Alexa fluor 647 conjugated Goat anti-Rabbit secondary antibody</b> | Abcam | ab150083 | IF,:1-500 |
