# Supplementary material for: Integrin-Linked Kinase Expression in Human Valve Endothelial Cells Plays a Protective Role in Calcific Aortic Valve Disease
Source: MDPI journal article supplement (doi:10.3390/antiox11091736), 2022-08-31
Supplement: s1 [file s1]

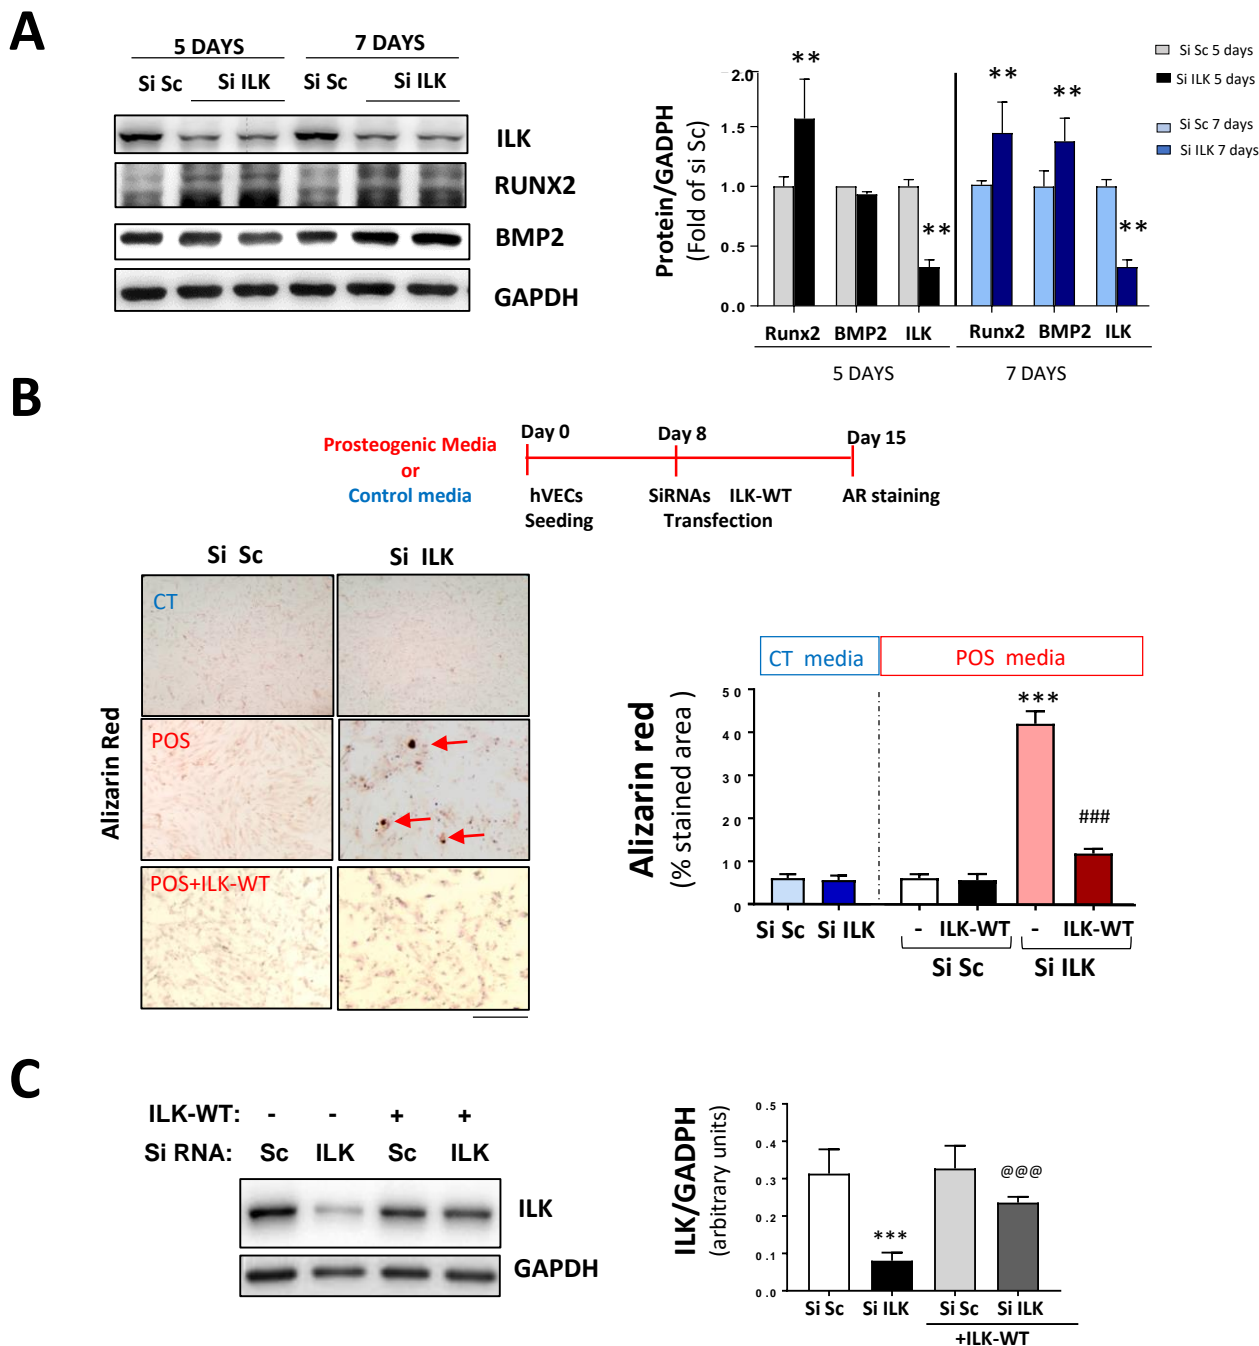

**Figure S1. Silencing ILK in human valve endothelial cells increases osteogenic markers. A)** Western blot analysis and quantification of RUNX2 and BMP2 in hVECs transfected with siRNA Scramble (Si Sc) or siRNA ILK (Si ILK) for 5 and 7 days.  $n=7$ ;  $**p<0.001$  vs Si Sc. hVECs were cultured in endothelial cell media **B)** Upper panel: experimental design of the experiment. Left lower panel: Alizarin Red staining of hVECs cultured with control (CT) or pro-osteogenic (POS) media for 15 days and transfected with siSc or siILK the last seven days. hVECs were transfected with V5-tagged ILK-WT three days after ILK silencing. Scale bar= 100  $\mu$ m. Right lower panel: Quantification of alizarin red staining ( $n=8$ ).  $***p<0.0001$  vs. Si Sc in POS media;  $###p<0.001$  vs. Si ILK Left lower panel. **C)** Representative western blot of ILK expression in cells treated as in B) ( $n=6$ ).  $***p<0.0001$  vs. Si S;  $@@@p<0.001$  vs. Si ILK.

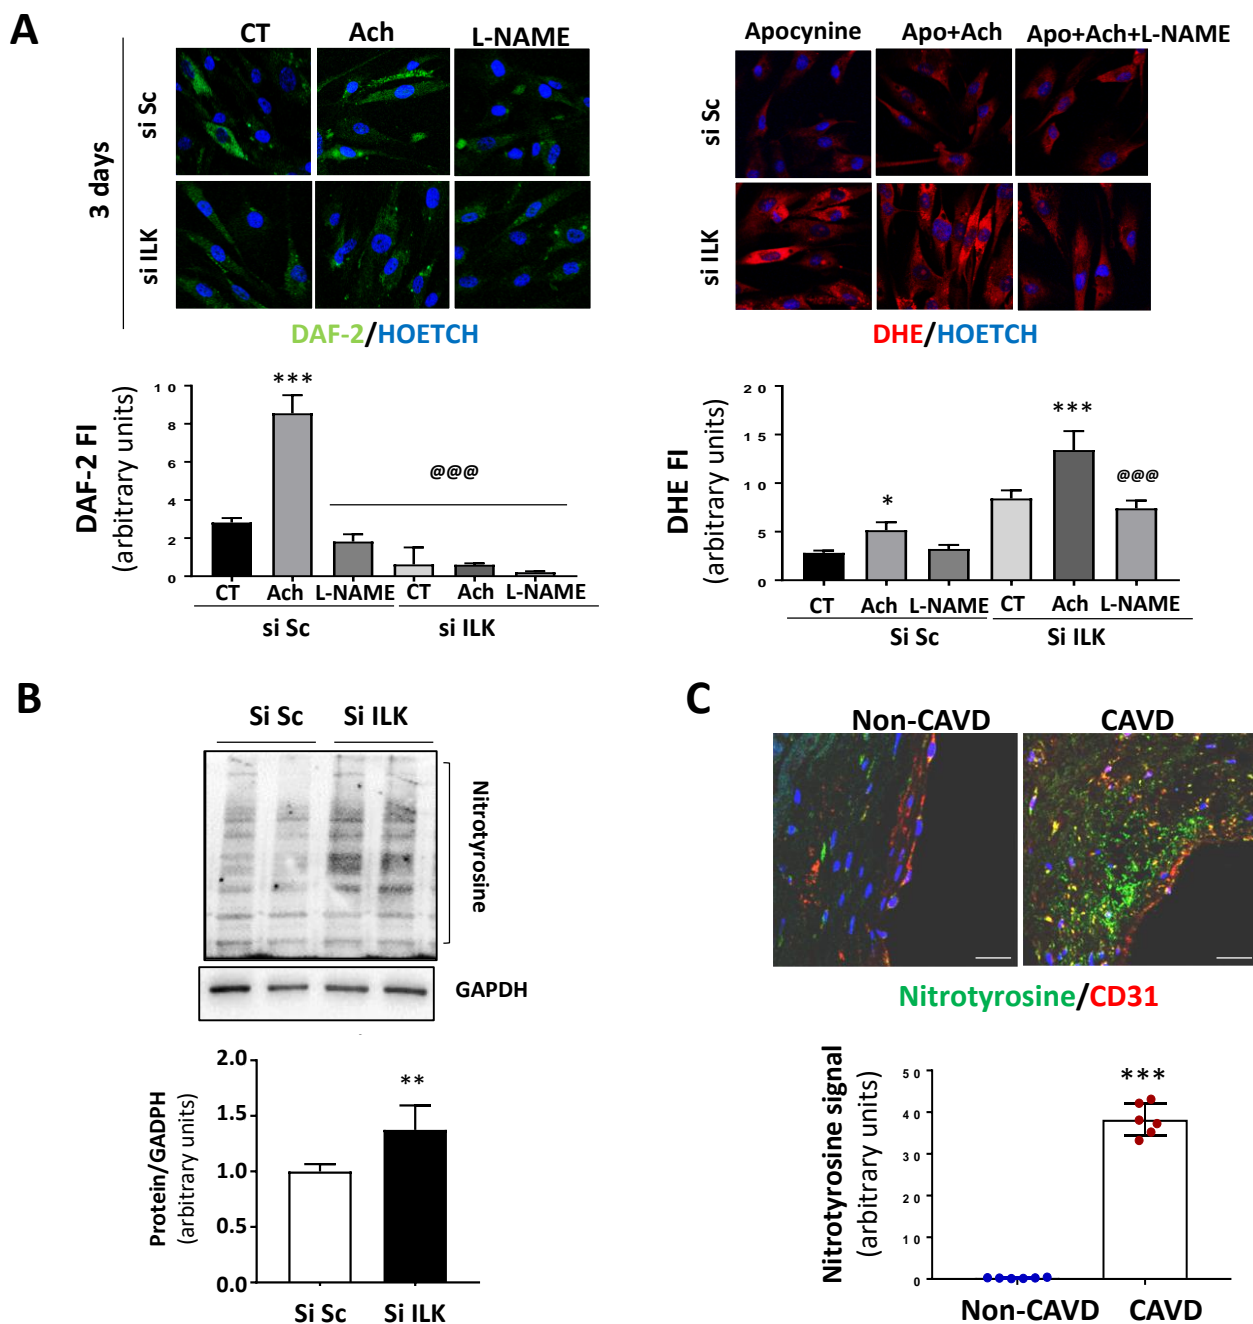

**Figure S2. ILK silencing in hVEC impairs nitric oxide production by eNOS. A)** Confocal microscopy images of DAF-2 probe (left panel) or DHE probe (right panel) in hVECs transfected with siSc or silk for 3 days. Cells were pre-treated with saline buffer (CT), Acetylcholine (Ach), L-NAME, Apocynin (Apo) or in combination according to the experimental procedure. Scale bar= 10  $\mu$ m. Below: quantification of fluorescence intensity n=6; \*\*\*p<0.0001 vs. Si Sc, @@@p<0.0001 vs Si ILK. **B)** Western blot analysis (up) and quantification (down) of nitrotyrosine formation in siSc or siILK hVEC. n=4; \*p<0.05 **C)** Immunofluorescence of nitrotyrosine (green) and CD31 (red) in non-CAVD or CAVD human aortic valve leaflets. Nuclei were counterstained with Hoechst. n=6, scale bar= 25  $\mu$ m. \*\*\*p<0.001. Below: quantification of nitrotyrosine. N=6 \*\*\*p<0.0001.

**A**

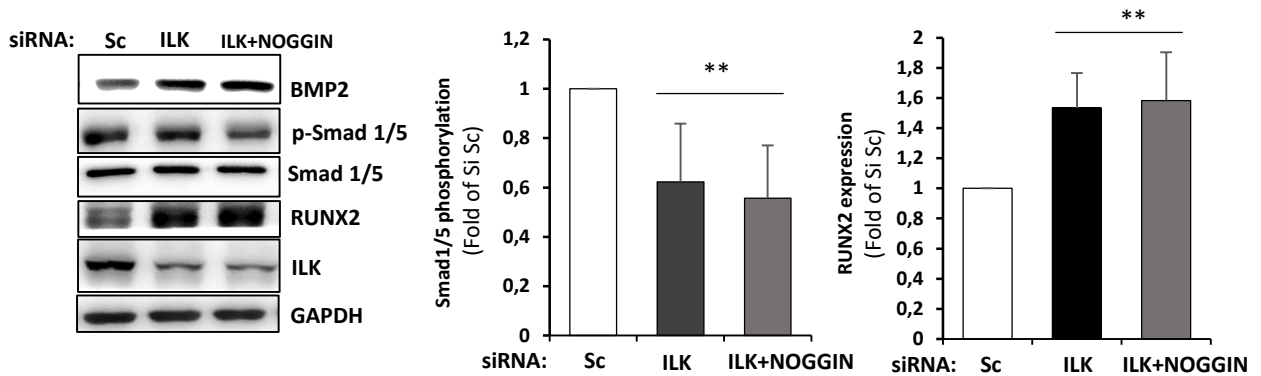

**B**

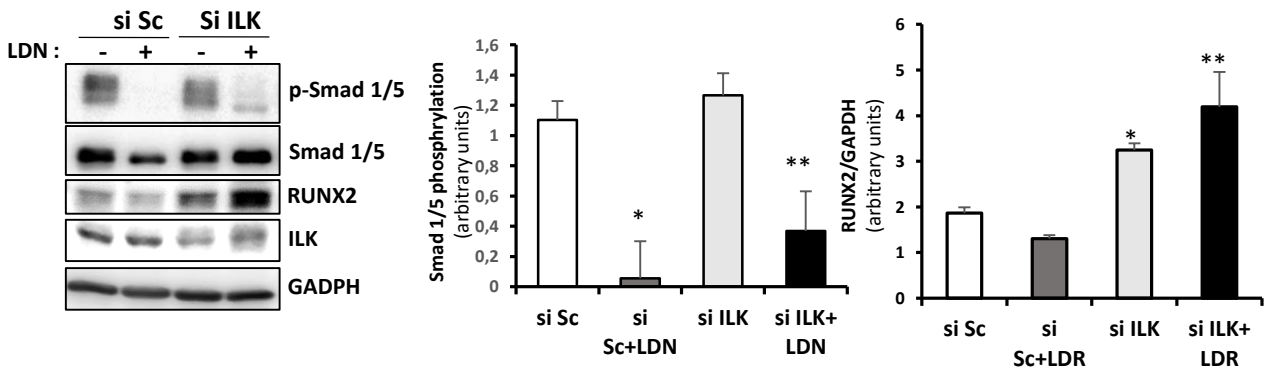

**Figure S3. Inhibition of BMP2 pathway in ILK-silenced hVEC does not restore Runx2 levels. A-B)** Western blot (left) and quantification (right) of BMP2/Smad1-5/Runx2 axis in siSc or siILK hVEC treated with **A)** Noggin, a BMP2 agonist (n=6; \*\*p<0.001) or **B)** LDN-193189 (LDN), a selective BMP signaling inhibitor (n=3; \*p<0.01 vs siSC; \*\*p<0.001 vs si ILK).
