# Supplementary material for: Integrin-Linked Kinase Expression in Human Valve Endothelial Cells Plays a Protective Role in Calcific Aortic Valve Disease
Source: MDPI journal article supplement (doi:10.3390/antiox11091736), 2022-08-31
Supplement: s1 [file s1]

**Table S2:** List of most relevant clinical characteristics and preoperative comorbidities

| <b>PREOPERATIVE CLINICAL AND CARDIOLOGIC CHARACTERISTICS AND COMORBIDITIES</b> |              |                 |
|--------------------------------------------------------------------------------|--------------|-----------------|
| <b>Variables</b>                                                               | <b>CAVD</b>  | <b>NON-CAVD</b> |
| Age (years), mean (SD)                                                         | 67,73 (9,20) | 66,37 (10,68)   |
| Male sex, n (%)                                                                | 53 (70,67%)  | 19 (67,86%)     |
| Diabetes mellitus, n (%)                                                       | 23 (30,67%)  | 4 (14,29%)      |
| Dyslipidemia, n (%)                                                            | 44 (58,67%)  | 10 (35,71%)     |
| Smoking, n (%)                                                                 | 23 (30,67%)  | 12 (42,86%)     |
| Arterial hypertension, n (%)                                                   | 49 (65,33%)  | 21 (75%)        |
| Peripheral vascular disease, n (%)                                             | 11 (14,67%)  | 8 (28,57%)      |
| Chronic obstructive pulmonary disease (COPD), n (%)                            | 14 (18,76%)  | 3 (10,71%)      |
| Pre-operative atrial fibrillation, n (%)                                       | 17 (22,67%)  | 7 (25%)         |
| Coronary artery disease, n (%)                                                 | 13 (17,33%)  | 3 (10,71%)      |
| Concomitant mitral valve disease, n (%)                                        | 14 (18,66%)  | 1 (3,57%)       |
| Concomitant tricuspid valve disease, n (%)                                     | 5 (6,66%)    | 1 (3,57%)       |
| Concomitant aortic disease, n (%)                                              | 8 (10,66%)   | 10 (35,71%)     |
| LV systolic dysfunction                                                        | 29 (38,66%)  | 21 (75%)        |
| Preoperative congestive heart failure, n (%)                                   | 11 (14,66%)  | 4 (14,28%)      |
| NYHA III-IV, n (%)                                                             | 37 (49,33)   | 14 (50%)        |

SD: standard deviation; NYHA: New York Heart Association; LV: left ventricle; LV: left ventricle.
